# Supplementary material for: Methanol formation by catalytic hydrogenation of CO2on a nitrogen doped zinc oxide surface: an evaluative study on the mechanistic pathway by density functional theory
Source: Royal Society of Chemistry journal article supplement (doi:10.1039/c5ra10581a), 2015-01-01
Supplement: c5ra10581a1.pdf [file c5ra10581a1.pdf]

## Supporting information

### Methanol formation by catalytic hydrogenation of CO<sub>2</sub> on nitrogen doped zinc oxide surface: An evaluative study on the mechanistic pathway by density functional theory

Ramasamy Shanmugam,<sup>†,‡</sup> Arunachalam Thamarachelvan,<sup>†</sup> and

Balasubramanian Viswanathan,<sup>\*,‡</sup>

<sup>†</sup>Department of Chemistry, Thiagarajar College, Madurai, Tamilnadu 6250 09, India

<sup>‡</sup>National Center for Catalysis Research, Indian Institute of Technology Madras, Chennai,  
Tamilnadu 600 036, India

\*E-mail: [bvnathan@iitm.ac.in](mailto:bvnathan@iitm.ac.in)

#### Supporting information-1

The binding energies of CO<sub>2</sub> on Zn<sub>18</sub>O<sub>18</sub> were calculated and shown in **Table 1**. The difference of -0.80 eV was observed between pure and nitrogen doped surface indicates the presence of N favors more adsorption than the pure state.

**Table 1**

|                       | Zn <sub>18</sub> O <sub>17</sub> :N | Zn <sub>18</sub> O <sub>18</sub> |
|-----------------------|-------------------------------------|----------------------------------|
| <b>Binding energy</b> | -1.86 eV                            | <b>-1.06 eV</b>                  |

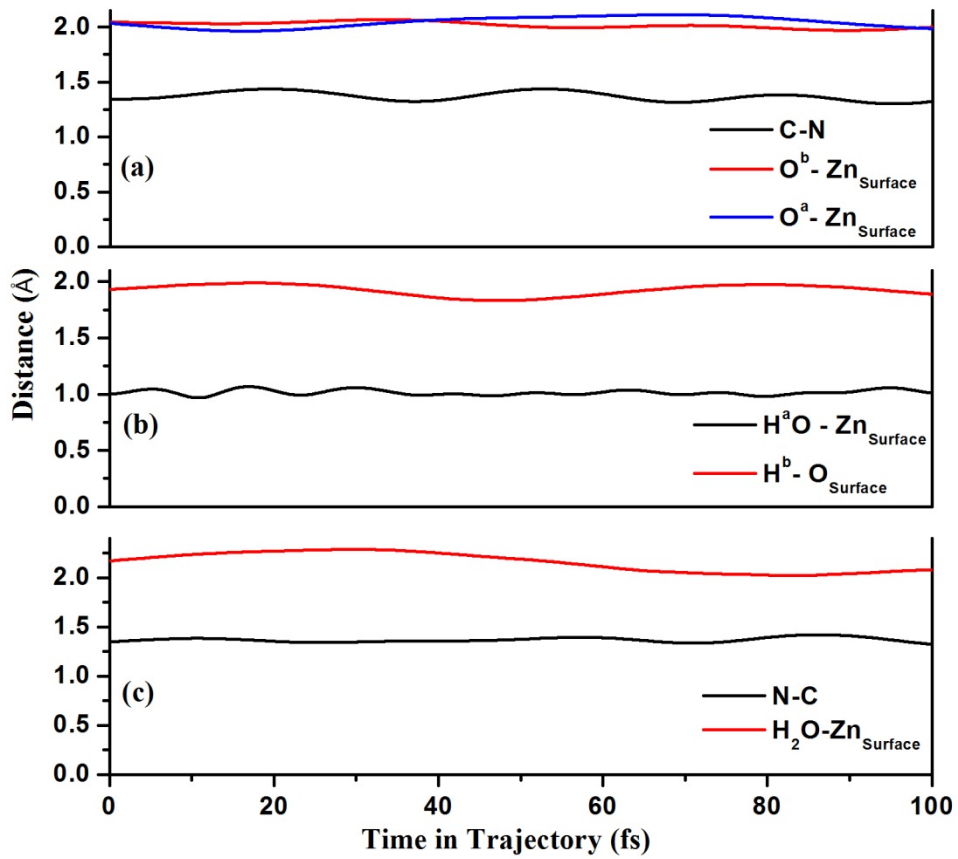

**Figure 1.** ADMP molecular dynamics profile of (a) carbamate, (b) dissociative adsorbed H<sub>2</sub>O and (c) coadsorbed CO<sub>2</sub> & H<sub>2</sub>O species on nitrogen doped zinc oxide clusters.
